# Supplementary material for: Metabolomic alterations associated with Behçet’s disease
Source: Springer Nature journal article supplement (doi:10.1186/s13075-018-1712-y), 2018-09-24

A

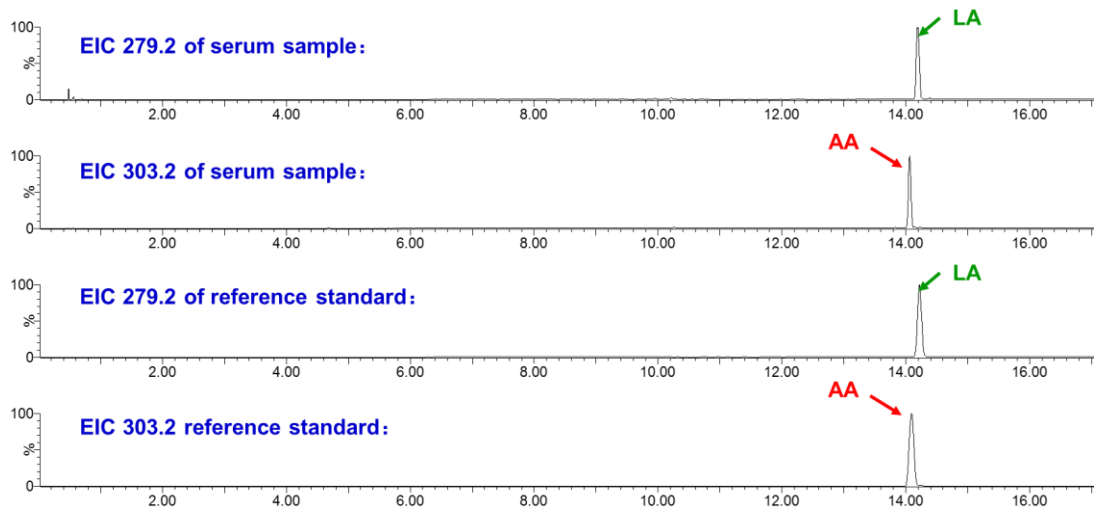

B

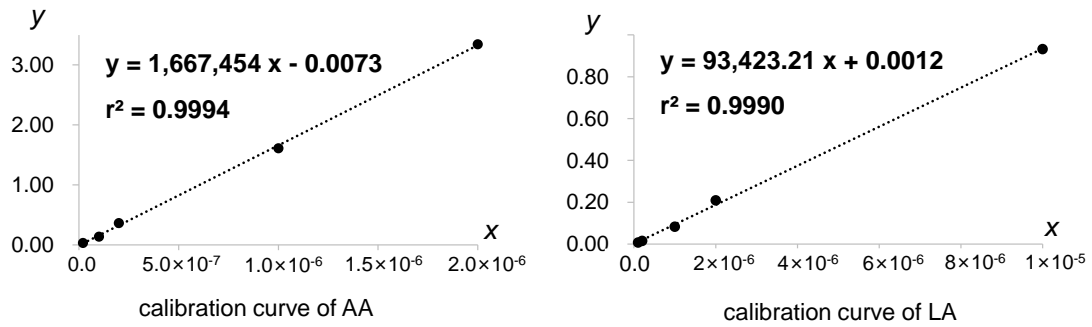

C

Contents of LA and AA in BD and HC samples

| sample ID | sex* | age | hCRP   | ESR | BDCAF 2006 | IgG   | IgA  | IgM  | content of AA (v/v) | content of LA (v/v) |
|-----------|------|-----|--------|-----|------------|-------|------|------|---------------------|---------------------|
| BD-1      | M    | 19  | 64.91  | 53  | 4          | 10.76 | 3.1  | 1.22 | 0.00048%            | 0.00222%            |
| BD-2      | F    | 16  | 15.92  | 36  | 2          | 19.37 | 4.1  | 1.1  | 0.00050%            | 0.00238%            |
| BD-3      | F    | 56  | 6.68   | 26  | 4          | 17.04 | 3.72 | 0.61 | 0.00049%            | 0.00157%            |
| BD-4      | M    | 45  | 18.23  | 18  | 1          |       |      |      | 0.00044%            | 0.00259%            |
| BD-5      | M    | 33  | 26.77  | 81  | 2          | 27.04 | 3.01 | 1.51 | 0.00051%            | 0.00278%            |
| BD-6      | M    | 25  | 133.34 | 32  | 3          | 14.39 | 3.48 | 1.1  | 0.00030%            | 0.00157%            |
| BD-7      | M    | 31  | 15.88  | 15  |            | 16.26 | 4.71 | 0.83 | 0.00040%            | 0.00224%            |
| BD-8      | M    | 42  | 18.99  | 20  | 2          | 11.29 | 3.42 | 1.37 | 0.00027%            | 0.00169%            |
| BD-9      | F    | 43  | 7.2    | 44  | 1          | 14.73 | 3.35 | 1.63 | 0.00035%            | 0.00154%            |
| BD-10     | M    | 30  | 13.47  | 53  | 1          | 18.94 | 1.64 | 1.41 | 0.00048%            | 0.00184%            |
| BD-11     | F    | 23  | 10.09  | 25  | 2          | 14.26 | 4.56 | 1.52 | 0.00038%            | 0.00133%            |
| BD-12     | F    | 32  | 8      | 7   | 2          | 10.7  | 2.06 | 1.32 | 0.00038%            | 0.00254%            |
| BD-13     | M    | 38  | 0.86   | 10  | 3          | 15.93 | 5.15 | 1.21 | 0.00083%            | 0.00439%            |

|       |   |    |      |    |   |       |      |      |          |          |
|-------|---|----|------|----|---|-------|------|------|----------|----------|
| BD-14 | M | 55 | 1.86 | 3  | 1 |       |      |      | 0.00025% | 0.00246% |
| BD-15 | F | 19 | 3.73 | 20 | 2 |       |      |      | 0.00035% | 0.00211% |
| BD-16 | F | 15 | 1.5  | 14 | 2 | 15.98 | 2.84 | 1.43 | 0.00015% | 0.00084% |
| BD-17 | F | 23 | 0.06 | 2  | 2 |       |      |      | 0.00043% | 0.00491% |
| BD-18 | F | 45 | 1.26 | 20 | 3 | 10.48 | 1.82 | 2.09 | 0.00026% | 0.00171% |
| BD-19 | F | 40 | 1.18 | 12 | 2 | 13.14 | 1.78 | 1.54 | 0.00077% | 0.00314% |
| BD-20 | M | 34 | 4.03 | 11 | 2 | 13.84 | 3.09 | 1.47 | 0.00031% | 0.00209% |
| BD-21 | F | 13 | 0.29 | 5  | 1 | 12.27 | 2.29 | 2.58 | 0.00038% | 0.00136% |
| BD-22 | M | 24 | 7.22 | 6  | 4 | 10.5  | 2.23 | 0.46 | 0.00043% | 0.00257% |
| BD-23 | M | 67 | 1.44 | 14 | 4 | 13.87 | 2.15 | 2.09 | 0.00040% | 0.00229% |
| BD-24 | F | 46 | 2.03 | 15 | 4 | 11.35 | 5.06 | 1.15 | 0.00029% | 0.00291% |
| BD-25 | F | 46 | 1.22 | 8  | 1 | 12.61 | 3.71 | 0.51 | 0.00051% | 0.00332% |
| HC-1  |   |    |      |    |   |       |      |      | 0.00020% | 0.00127% |
| HC-2  |   |    |      |    |   |       |      |      | 0.00020% | 0.00111% |
| HC-3  |   |    |      |    |   |       |      |      | 0.00021% | 0.00178% |
| HC-4  |   |    |      |    |   |       |      |      | 0.00022% | 0.00128% |
| HC-5  |   |    |      |    |   |       |      |      | 0.00026% | 0.00108% |
| HC-6  |   |    |      |    |   |       |      |      | 0.00007% | 0.00142% |
| HC-7  |   |    |      |    |   |       |      |      | 0.00016% | 0.00091% |
| HC-8  |   |    |      |    |   |       |      |      | 0.00024% | 0.00121% |
| HC-9  |   |    |      |    |   |       |      |      | 0.00017% | 0.00210% |
| HC-10 |   |    |      |    |   |       |      |      | 0.00025% | 0.00113% |
| HC-11 |   |    |      |    |   |       |      |      | 0.00016% | 0.00108% |
| HC-12 |   |    |      |    |   |       |      |      | 0.00021% | 0.00169% |
| HC-13 |   |    |      |    |   |       |      |      | 0.00021% | 0.00142% |
| HC-14 |   |    |      |    |   |       |      |      | 0.00024% | 0.00165% |
| HC-15 |   |    |      |    |   |       |      |      | 0.00017% | 0.00146% |
| HC-16 |   |    |      |    |   |       |      |      | 0.00013% | 0.00162% |
| HC-17 |   |    |      |    |   |       |      |      | 0.00018% | 0.00182% |
| HC-18 |   |    |      |    |   |       |      |      | 0.00030% | 0.00185% |
| HC-19 |   |    |      |    |   |       |      |      | 0.00006% | 0.00084% |

\* Note: M, male; F, female.

D

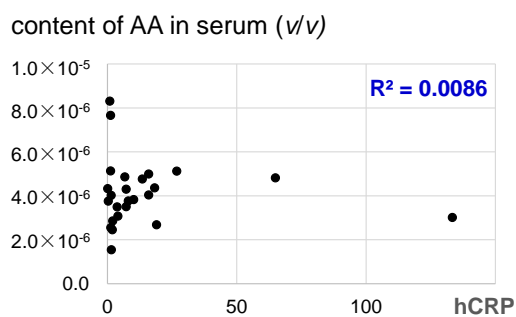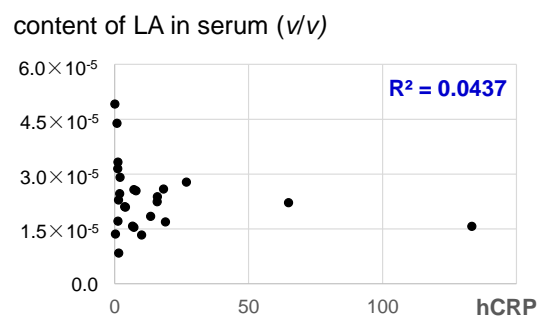

content of AA in serum (v/v)

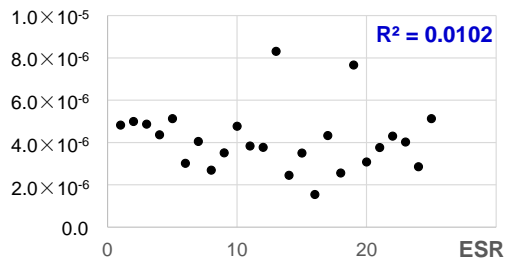

content of LA in serum (v/v)

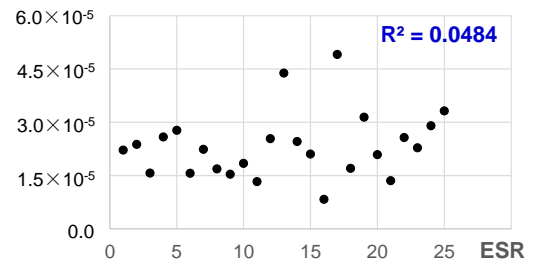

Supplement: MOESM5 [file 16148000]
