# Supplementary material for: Metabolomic alterations associated with Behçet’s disease
Source: PubMed Central journal article supplement (PMC6154820; doi:10.1186/s13075-018-1712-y), 2018-09-24
Supplement: 13075_2018_1712_MOESM1_ESM.pdf [file 13075_2018_1712_MOESM1_ESM.pdf]

### PC (35:2)

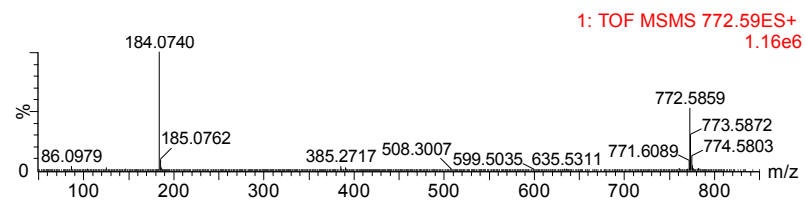

### PC (36:6)

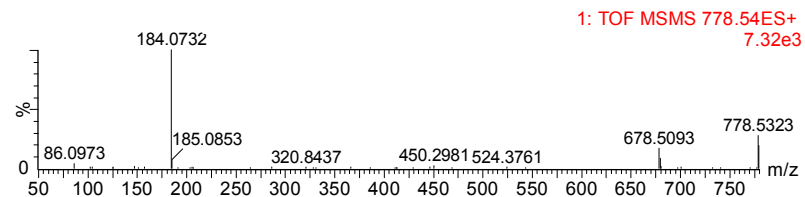

### PC (P-40:6)

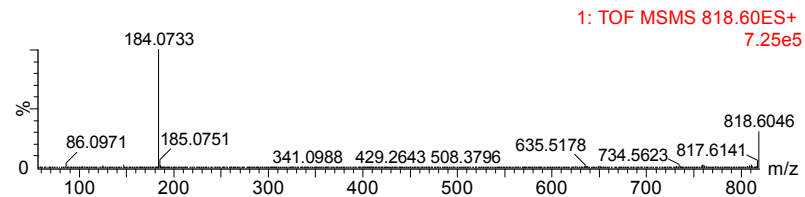

Additional file 1
