# Supplementary material for: Metabolomic alterations associated with Behçet’s disease
Source: PubMed Central journal article supplement (PMC6154820; doi:10.1186/s13075-018-1712-y), 2018-09-24

A

### Linoleic Acid

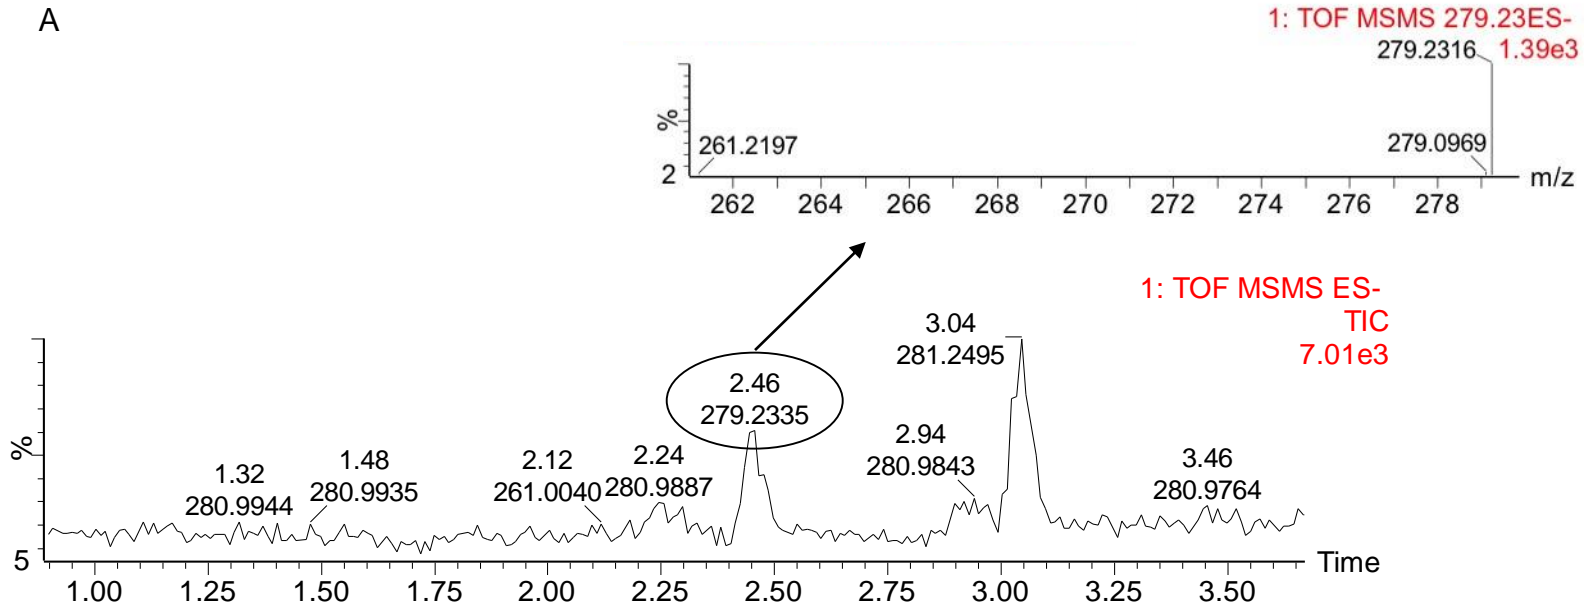

B

### Arachidonic Acid

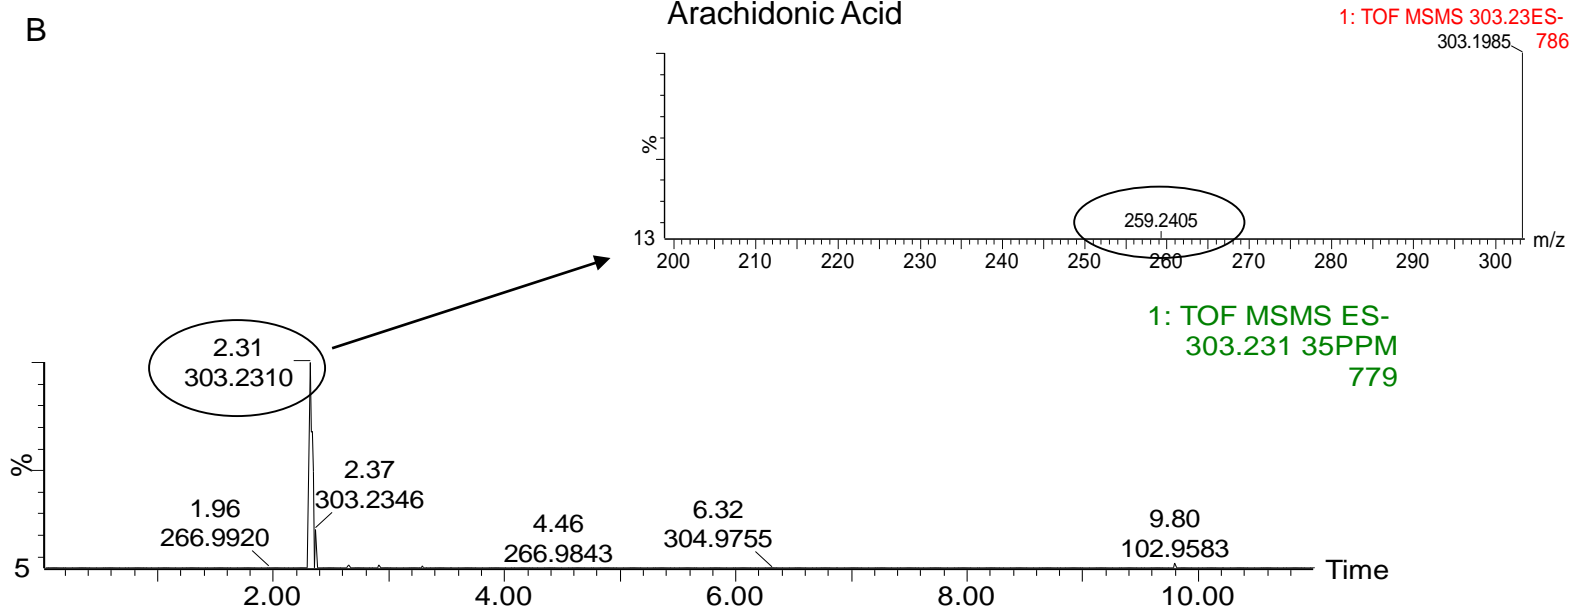

Supplement: 13075_2018_1712_MOESM2_ESM.pdf [file 13075_2018_1712_MOESM2_ESM.pdf]
