# Supplementary material for: Metabolomic alterations associated with Behçet’s disease
Source: Springer Nature journal article supplement (doi:10.1186/s13075-018-1712-y), 2018-09-24

A

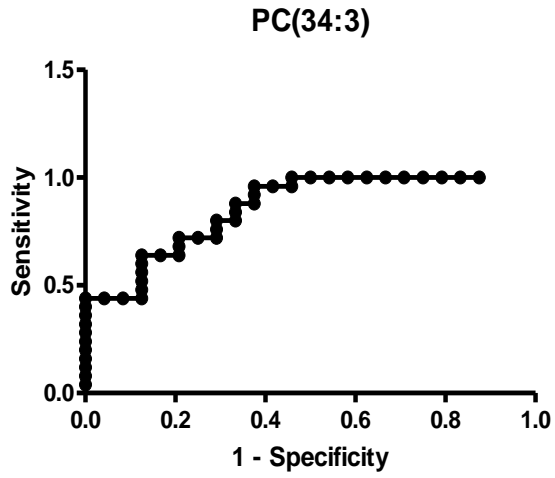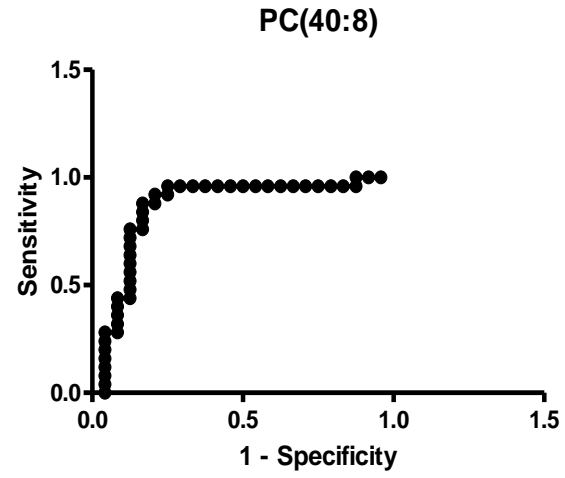

B

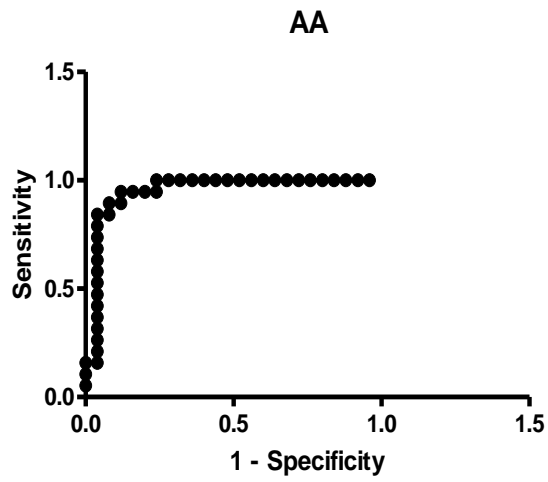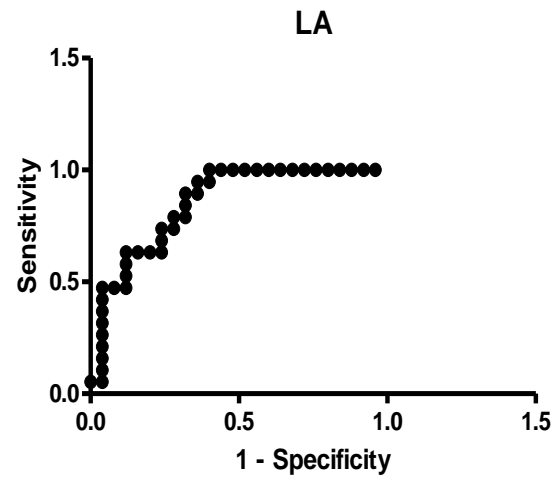

Supplement: MOESM4 [file 16148000]
